# Supplementary material
Source: HighWire-hosted journal article supplement (https://www.highwirestage.com/highwire/filestream/52859/field_highwire_adjunct_files/0/16-01106.pdf)
Supplement: 16-01106.pdf [file 16-01106.pdf]

**On-line Table 1: Failure to attribute primary outcome<sup>a</sup>**

|                     | PRET-1                |                       | PRET-2               |                       | PRET                  |                       |
|---------------------|-----------------------|-----------------------|----------------------|-----------------------|-----------------------|-----------------------|
|                     | Platinum<br>(n = 125) | Hydrogel<br>(n = 125) | Platinum<br>(n = 97) | Hydrogel<br>(n = 100) | Platinum<br>(n = 222) | Hydrogel<br>(n = 225) |
| Missing outcome     | 1 (0.8%)              | 3 (2.4%)              | 1 (1.0%)             | 4 (4.0%)              | 2 (0.9%)              | 7 (3.1%)              |
| Unrelated mortality | 0 (0.0%)              | 1 (0.8%)              | 0 (0.0%)             | 0 (0.0%)              | 0 (0.0%)              | 1 (0.4%)              |
| Lost to follow-up   | 1 (0.8%)              | 1 (0.8%)              | 1 (1.0%)             | 3 (3.0%)              | 2 (0.9%)              | 4 (1.8%)              |
| Consent withdrawn   | 0 (0.0%)              | 1 (0.8%)              | 0 (0.0%)             | 1 (1.0%)              | 0 (0.0%)              | 2 (0.9%)              |

<sup>a</sup> Distribution of patients in which no primary outcome was attributed. Data are numbers.

**On-line Table 2: Primary outcome in patients in PRET with an unruptured aneurysm<sup>a</sup>**

|                                               | PRET-1               |                      | PRET-2               |                      | PRET                  |                       |
|-----------------------------------------------|----------------------|----------------------|----------------------|----------------------|-----------------------|-----------------------|
|                                               | Platinum<br>(n = 87) | Hydrogel<br>(n = 88) | Platinum<br>(n = 94) | Hydrogel<br>(n = 91) | Platinum<br>(n = 181) | Hydrogel<br>(n = 179) |
| Primary outcome                               | 35 (40.2%)           | 42 (47.7%)           | 45 (47.9%)           | 38 (41.8%)           | 80 (44.2%)            | 80 (44.7%)            |
| Major recurrence                              | 21 (24.1%)           | 29 (33.0%)           | 31 (33.0%)           | 25 (27.5%)           | 52 (28.7%)            | 54 (30.2%)            |
| Retreatment                                   | 6 (6.9%)             | 9 (10.2%)            | 10 (10.6%)           | 5 (5.5%)             | 16 (8.8%)             | 14 (7.8%)             |
| Initial treatment failure                     | 2 (2.3%)             | 0 (0.0%)             | 0 (0.0%)             | 4 (4.4%)             | 2 (1.1%)              | 4 (2.2%)              |
| SAH                                           | 1 (1.1%)             | 0 (0.0%)             | 1 (1.1%)             | 1 (1.1%)             | 2 (1.1%)              | 1 (0.6%)              |
| Mass effect                                   | 0 (0.0%)             | 1 (1.1%)             | 3 (3.2%)             | 0 (0.0%)             | 3 (1.7%)              | 1 (0.6%)              |
| Related mortality                             | 1 (1.1%)             | 0 (0.0%)             | 0 (0.0%)             | 0 (0.0%)             | 1 (0.6%)              | 0 (0.0%)              |
| Related morbidity                             | 2 (2.3%)             | 1 (1.1%)             | 0 (0.0%)             | 0 (0.0%)             | 2 (1.1%)              | 1 (0.6%)              |
| Last observation carried forward <sup>b</sup> | 2 (2.3%)             | 2 (2.3%)             | 0 (0.0%)             | 3 (3.3%)             | 2 (1.1%)              | 5 (2.8%)              |

<sup>a</sup> Data are numbers.

<sup>b</sup> Residual aneurysm at initial treatment and no angiographic follow-up.

**On-line Table 3: Primary outcome in patients in PRET with an internal carotid aneurysm<sup>a</sup>**

|                                               | PRET-1               |                      | PRET-2               |                      | PRET                  |                       |
|-----------------------------------------------|----------------------|----------------------|----------------------|----------------------|-----------------------|-----------------------|
|                                               | Platinum<br>(n = 58) | Hydrogel<br>(n = 66) | Platinum<br>(n = 43) | Hydrogel<br>(n = 40) | Platinum<br>(n = 101) | Hydrogel<br>(n = 106) |
| Primary outcome                               | 24 (41.4%)           | 32 (48.5%)           | 20 (46.5%)           | 18 (45.0%)           | 44 (43.6%)            | 50 (47.2%)            |
| Major recurrence                              | 16 (27.6%)           | 17 (25.8%)           | 13 (30.2%)           | 10 (25.0%)           | 29 (28.7%)            | 27 (25.5%)            |
| Retreatment                                   | 5 (8.6%)             | 11 (16.7%)           | 6 (14.0%)            | 5 (12.5%)            | 11 (10.9%)            | 16 (15.1%)            |
| Initial treatment failure                     | 1 (1.7%)             | 0 (0.0%)             | 0 (0.0%)             | 1 (2.5%)             | 1 (1.0%)              | 1 (0.9%)              |
| SAH                                           | 0 (0.0%)             | 1 (1.5%)             | 1 (2.3%)             | 1 (2.5%)             | 1 (1.0%)              | 2 (1.9%)              |
| Mass effect                                   | 0 (0.0%)             | 0 (0.0%)             | 0 (0.0%)             | 0 (0.0%)             | 0 (0.0%)              | 0 (0.0%)              |
| Related mortality                             | 0 (0.0%)             | 1 (1.5%)             | 0 (0.0%)             | 0 (0.0%)             | 0 (0.0%)              | 1 (0.9%)              |
| Related morbidity                             | 0 (0.0%)             | 0 (0.0%)             | 0 (0.0%)             | 0 (0.0%)             | 0 (0.0%)              | 0 (0.0%)              |
| Last observation carried forward <sup>b</sup> | 2 (3.4%)             | 2 (3.0%)             | 0 (0.0%)             | 1 (2.5%)             | 2 (2.0%)              | 3 (2.8%)              |

<sup>a</sup> Data are numbers.

<sup>b</sup> Residual aneurysm at initial treatment and no angiographic follow-up.

**On-line Table 4: Primary outcome in patients in PRET with stent-assisted coiling<sup>a</sup>**

|                                               | PRET-1               |                      | PRET-2               |                      | PRET                 |                      |
|-----------------------------------------------|----------------------|----------------------|----------------------|----------------------|----------------------|----------------------|
|                                               | Platinum<br>(n = 25) | Hydrogel<br>(n = 28) | Platinum<br>(n = 32) | Hydrogel<br>(n = 34) | Platinum<br>(n = 57) | Hydrogel<br>(n = 62) |
| Primary outcome                               | 12 (48.0%)           | 20 (71.4%)           | 14 (43.8%)           | 9 (26.5%)            | 26 (45.6%)           | 29 (46.8%)           |
| Major recurrence                              | 6 (24.0%)            | 15 (53.6%)           | 9 (28.1%)            | 5 (14.7%)            | 15 (26.3%)           | 20 (32.3%)           |
| Retreatment                                   | 2 (8.0%)             | 2 (7.1%)             | 3 (9.4%)             | 2 (5.9%)             | 5 (8.8%)             | 4 (6.5%)             |
| Initial treatment failure                     | 0 (0.0%)             | 0 (0.0%)             | 0 (0.0%)             | 0 (0.0%)             | 0 (0.0%)             | 0 (0.0%)             |
| SAH                                           | 1 (4.0%)             | 0 (0.0%)             | 0 (0.0%)             | 0 (0.0%)             | 1 (1.8%)             | 0 (0.0%)             |
| Mass effect                                   | 0 (0.0%)             | 1 (3.6%)             | 2 (6.3%)             | 0 (0.0%)             | 2 (3.5%)             | 1 (1.6%)             |
| Related mortality                             | 0 (0.0%)             | 0 (0.0%)             | 0 (0.0%)             | 0 (0.0%)             | 0 (0.0%)             | 0 (0.0%)             |
| Related morbidity                             | 2 (8.0%)             | 1 (3.6%)             | 0 (0.0%)             | 1 (2.9%)             | 2 (3.5%)             | 2 (3.2%)             |
| Last observation carried forward <sup>b</sup> | 1 (4.0%)             | 1 (3.6%)             | 0 (0.0%)             | 1 (2.9%)             | 1 (1.8%)             | 2 (3.2%)             |

<sup>a</sup> Data are numbers.

<sup>b</sup> Residual aneurysm at initial treatment and no angiographic follow-up.

On-line Table 5: Sensitivity analyses

| Primary Outcome                                                                | PRET-1        |               |                                | PRET-2        |               |                                | PRET           |                |                                |
|--------------------------------------------------------------------------------|---------------|---------------|--------------------------------|---------------|---------------|--------------------------------|----------------|----------------|--------------------------------|
|                                                                                | Platinum      | Hydrogel      | OR, 95% CI,<br>P Value         | Platinum      | Hydrogel      | OR, 95% CI,<br>P Value         | Platinum       | Hydrogel       | OR, 95% CI,<br>P Value         |
| Patients with angiographic outcome only ( <i>n</i> = 426)                      | 51<br>(42.5%) | 61<br>(51.7%) | 1.448<br>(0.868–2.414)<br>.156 | 47<br>(49.0%) | 37<br>(40.2%) | 0.701<br>(0.394–1.250)<br>.229 | 98<br>(45.4%)  | 98<br>(46.7%)  | 1.054<br>(0.720–1.542)<br>.788 |
| Missing outcome attributed to primary outcome not met (good) ( <i>n</i> = 444) | 55<br>(44.4%) | 63<br>(51.2%) | 1.336<br>(0.811–2.203)<br>.255 | 47<br>(48.5%) | 40<br>(40.4%) | 0.721<br>(0.410–1.270)<br>.257 | 102<br>(45.9%) | 103<br>(46.4%) | 1.018<br>(0.701–1.479)<br>.924 |
| Missing outcome attributed to primary outcome met (poor) ( <i>n</i> = 444)     | 56<br>(44.8%) | 66<br>(53.7%) | 1.427<br>(0.865–2.352)<br>.164 | 48<br>(49.5%) | 44<br>(44.4%) | 0.817<br>(0.466–1.432)<br>.480 | 104<br>(46.8%) | 110<br>(49.5%) | 1.114<br>(0.768–1.617)<br>.569 |
| Including patients withdrawn before intervention ( <i>n</i> = 447)             | 56<br>(44.8%) | 68<br>(54.4%) | 1.470<br>(0.893–2.419)<br>.130 | 48<br>(49.5%) | 45<br>(45.0%) | 0.835<br>(0.477–1.462)<br>.529 | 104<br>(46.8%) | 113<br>(50.2%) | 1.145<br>(0.790–1.659)<br>.475 |

On-line Table 6: Sensitivity analyses on the primary outcome when hydrogel target length was met<sup>a</sup>

| Primary Outcome                                                                | PRET-1                         | PRET-2                         | PRET                           | Effect Modification<br>(Interaction) (P Value) |
|--------------------------------------------------------------------------------|--------------------------------|--------------------------------|--------------------------------|------------------------------------------------|
|                                                                                | OR, 95% CI,<br>P Value         | OR, 95% CI,<br>P Value         | OR, 95% CI,<br>P Value         |                                                |
| Primary outcome ( <i>n</i> = 404)                                              | 1.415<br>(0.834–2.401)<br>.199 | 0.642<br>(0.354–1.163)<br>.144 | 0.993<br>(0.671–1.471)<br>.973 | .052                                           |
| Patients with angiographic outcome only ( <i>n</i> = 395)                      | 1.468<br>(0.858–2.511)<br>.161 | 0.581<br>(0.317–1.065)<br>.079 | 0.973<br>(0.653–1.449)<br>.893 | .025                                           |
| Missing outcome attributed to primary outcome not met (good) ( <i>n</i> = 413) | 1.349<br>(0.799–2.277)<br>.262 | 0.608<br>(0.337–1.096)<br>.098 | 0.943<br>(0.640–1.392)<br>.769 | .047                                           |
| Missing outcome attributed to primary outcome met (poor) ( <i>n</i> = 413)     | 1.468<br>(0.869–2.479)<br>.151 | 0.707<br>(0.395–1.265)<br>.243 | 1.054<br>(0.716–1.553)<br>.789 | .067                                           |
| Including patients withdrawn before intervention ( <i>n</i> = 413)             | 1.468<br>(0.869–2.479)<br>.151 | 0.707<br>(0.395–1.265)<br>.243 | 1.054<br>(0.716–1.553)<br>.789 | .067                                           |

<sup>a</sup> Sensitivity analysis when patients treated with hydrogel were restricted to those in whom the target hydrogel length was met (>two-thirds of total length).

On-line Table 7: Mortality<sup>a</sup>

|                                       | PRET-1                        |                               | PRET-2                       |                              | PRET                          |                               |
|---------------------------------------|-------------------------------|-------------------------------|------------------------------|------------------------------|-------------------------------|-------------------------------|
|                                       | Platinum<br>( <i>n</i> = 125) | Hydrogel<br>( <i>n</i> = 123) | Platinum<br>( <i>n</i> = 97) | Hydrogel<br>( <i>n</i> = 99) | Platinum<br>( <i>n</i> = 222) | Hydrogel<br>( <i>n</i> = 222) |
| Total                                 | 3 (2.4%)                      | 10 (8.1%)                     | 0 (0.0%)                     | 3 (3.0%)                     | 3 (1.4%)                      | 13 (5.9%)                     |
| Related to SAH at presentation        | 0 (0.0%)                      | 2 (1.6%)                      | 0 (0.0%)                     | 0 (0.0%)                     | 0 (0.0%)                      | 2 (0.9%)                      |
| Delayed, related to initial treatment | 1 (0.8%)                      | 1 (0.8%)                      | 0 (0.0%)                     | 0 (0.0%)                     | 1 (0.5%)                      | 1 (0.5%)                      |
| Related to SAH during follow-up       | 1 (0.8%)                      | 0 (0.0%)                      | 0 (0.0%)                     | 1 (1.0%)                     | 1 (0.5%)                      | 1 (0.5%)                      |
| Related to retreatment                | 0 (0.0%)                      | 2 (1.6%)                      | 0 (0.0%)                     | 0 (0.0%)                     | 0 (0.0%)                      | 2 (0.9%)                      |
| Unrelated                             | 1 (0.8%)                      | 5 (4.1%)                      | 0 (0.0%)                     | 2 (2.0%)                     | 1 (0.5%)                      | 7 (3.2%)                      |

<sup>a</sup> Overall mortality, recorded at any time point during the trial. Data are numbers.

**On-line Table 8: Unrelated mortality details<sup>a</sup>**

| ID  | PRET Type | Treatment Group | Age (yr) | Aneurysm Location | mRS at Last Follow-Up | Days After Intervention | Underlying Cause of Death                                      |
|-----|-----------|-----------------|----------|-------------------|-----------------------|-------------------------|----------------------------------------------------------------|
| 15  | PRET-2    | Hydrogel coils  | 74       | Other posterior   | 0                     | 508                     | Heart attack                                                   |
| 38  | PRET-1    | Hydrogel coils  | 61       | Other posterior   | 0                     | 169                     | Cancer recurrence                                              |
| 97  | PRET-1    | Hydrogel coils  | 68       | Basilar           | 0                     | 718                     | Complications associated with pneumonia following hip fracture |
| 242 | PRET-1    | Hydrogel coils  | 69       | Internal carotid  | 0                     | 241                     | Death from sepsis following knee replacement                   |
| 248 | PRET-1    | Hydrogel coils  | 78       | Internal carotid  | 0                     | 957                     | Complications from pneumonia following broken leg              |
| 280 | PRET-1    | Platinum coils  | 75       | Middle cerebral   | 0                     | 410                     | Polyvisceral, septic etiology (community pneumonia)            |
| 356 | PRET-1    | Hydrogel coils  | 67       | Internal carotid  | 3                     | 362                     | Metastatic breast cancer                                       |
| 417 | PRET-2    | Hydrogel coils  | 80       | Internal carotid  | 0                     | 622                     | Per death certificate, lymphoma stated as cause of death       |

**Note:**—ID indicates identification.

<sup>a</sup> Cause of death and patient and aneurysm characteristics when mortality was not related to the aneurysm or its treatment.
